# Supplementary material
Source: publisher site journal article supplement (https://static.cambridge.org/content/id/urn:cambridge.org:id:article:S0899823X20000756/resource/name/S0899823X20000756supp001.docx)
Supplement: Supplementary file 1 [file S0899823X20000756supp001.docx]

**Appendix 3. Subtypes of class modification by antibiotic spectrum. (A) broad-spectrum antibiotics started, and (B) narrow-spectrum antibiotics started.**

**
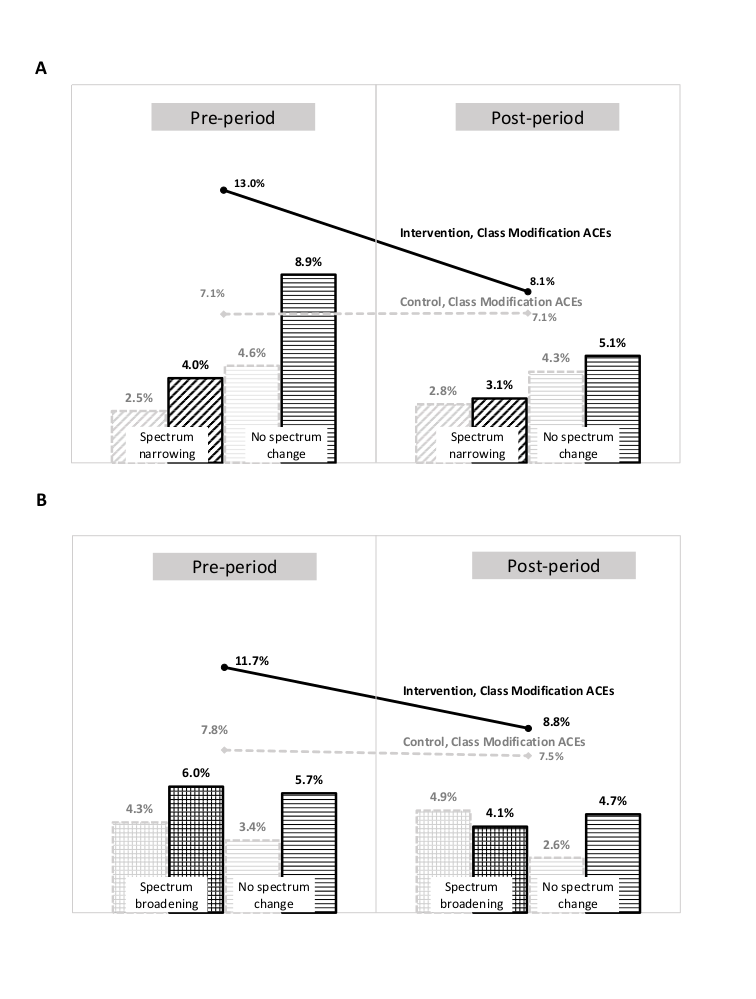
**
